# Supplementary material for: Computational Modeling of Information Propagation during the Sleep–Waking Cycle
Source: MDPI journal article supplement (doi:10.3390/biology10100945), 2021-09-22

# Evoked Response of Inhibitory Populations in the Two-Cortical-Column Model

**A**

## Inhibitory Population of the Perturbed Column

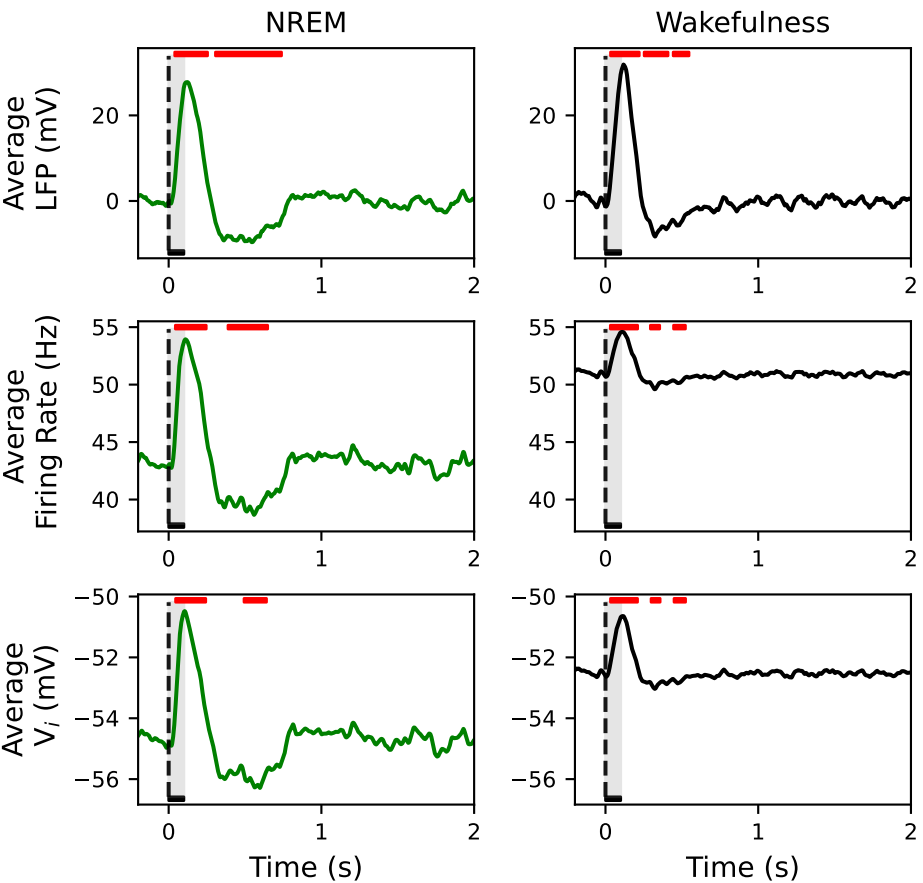**B**

## Inhibitory Population of the Unperturbed Column

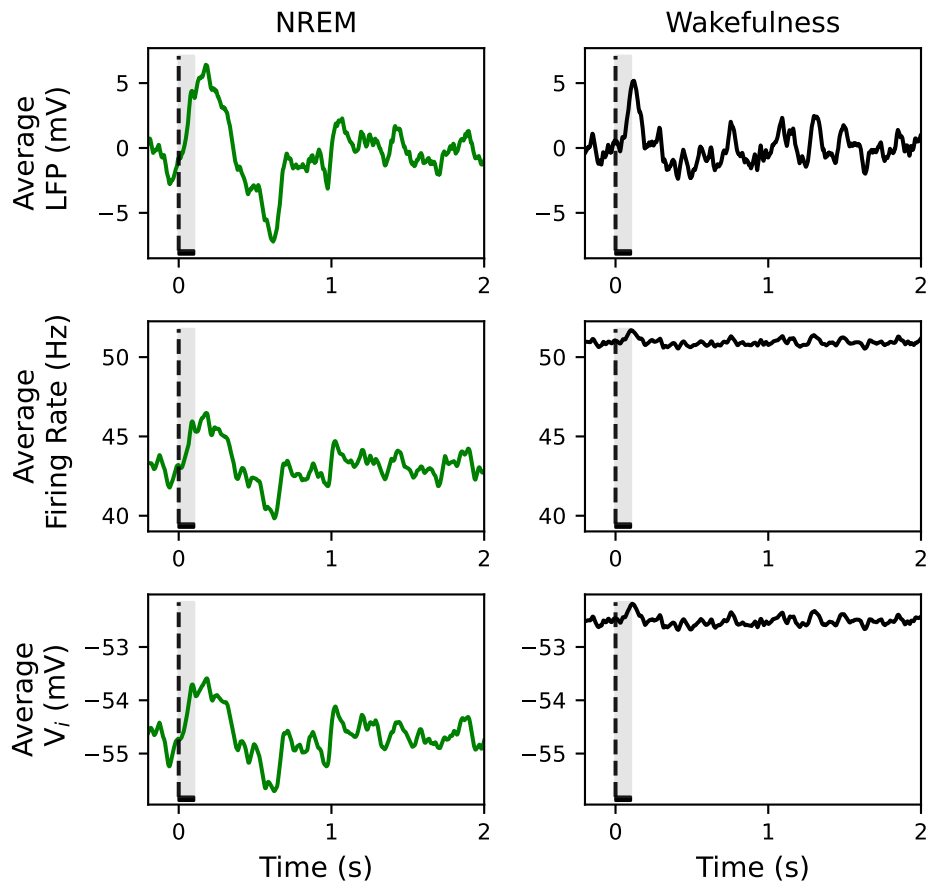

Supplement: s1 [file s1]
