# Supplementary material for: Computational Modeling of Information Propagation during the Sleep–Waking Cycle
Source: MDPI journal article supplement (doi:10.3390/biology10100945), 2021-09-22

# Information Propagation to the Pyramidal Population of the Unperturbed Column

A

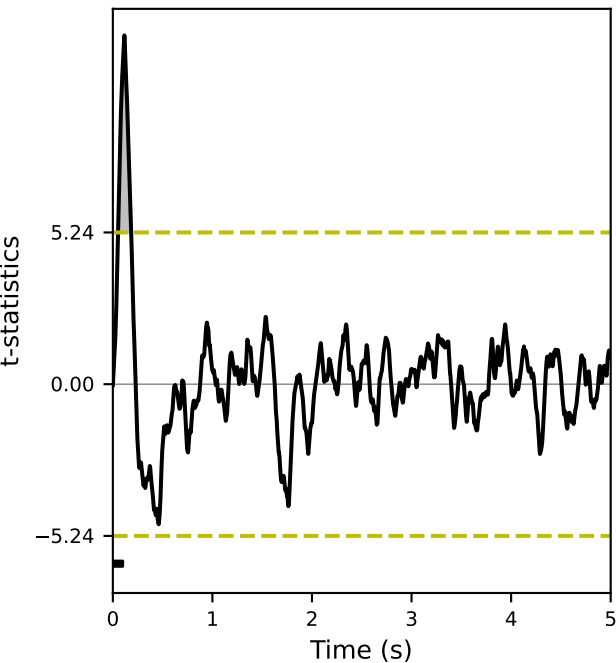

Bonferroni correction cluster

B

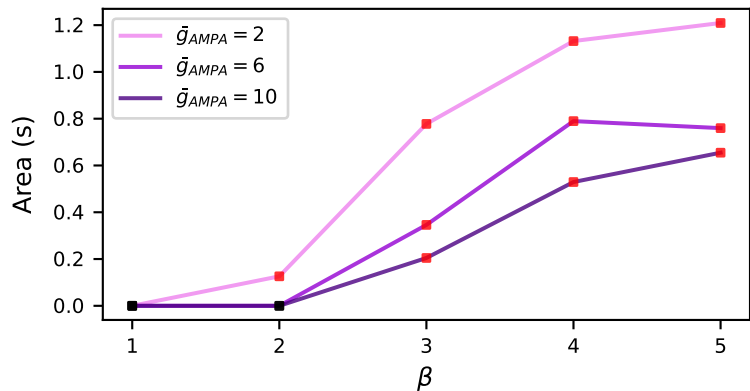

C

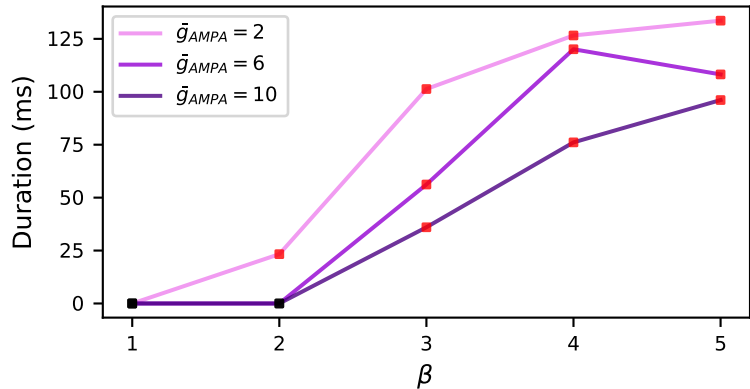

Supplement: s1 [file s1]
