# Supplementary figures and images for: Computational Modeling of Information Propagation during the Sleep–Waking Cycle
Source: MDPI journal article supplement (doi:10.3390/biology10100945), 2021-09-22

# Spontaneous Activity of Pyramidal Population in the Two-Cortical-Column Model

**A**

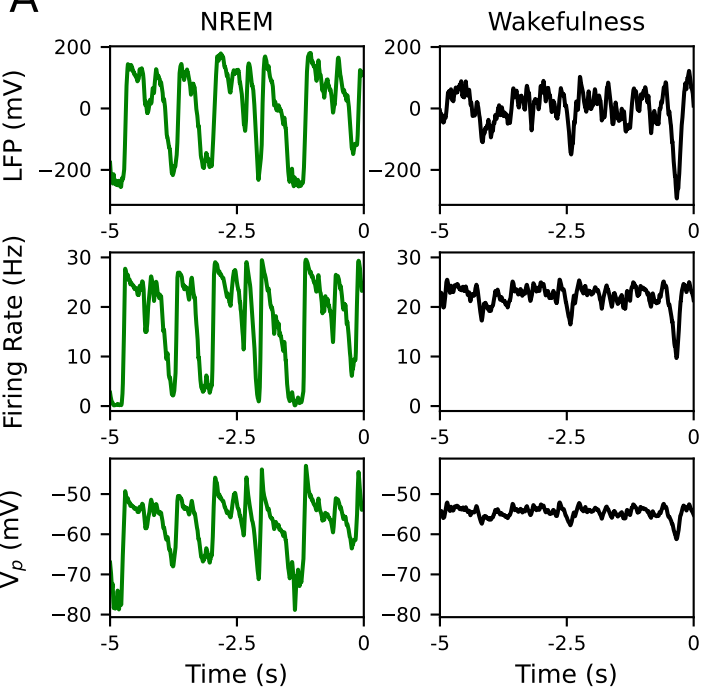

**B**

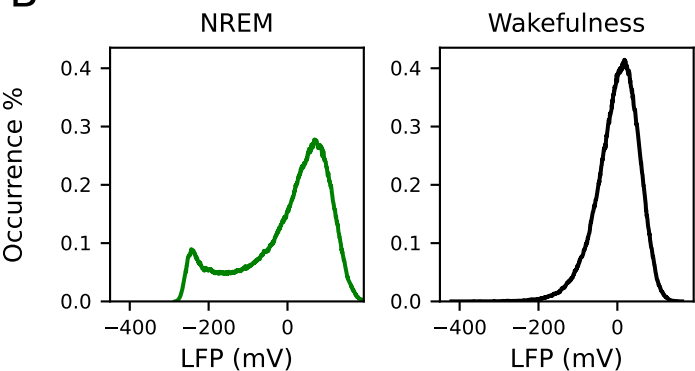

**C**

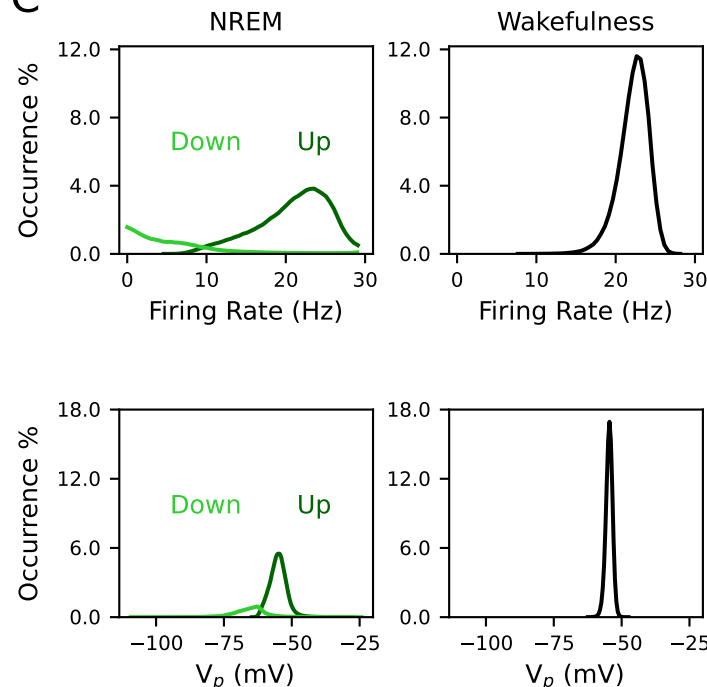

**D**

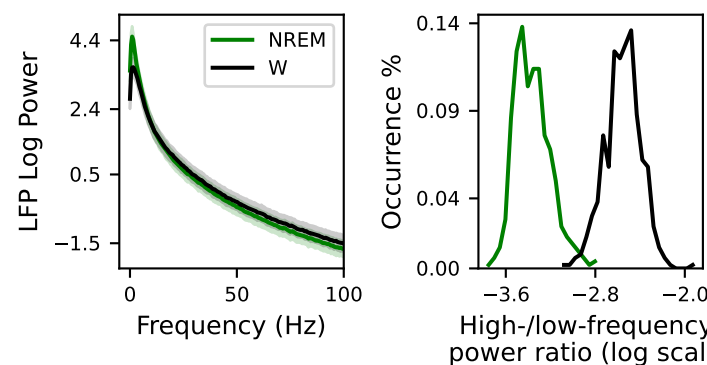

Supplement: s1 [file s1]

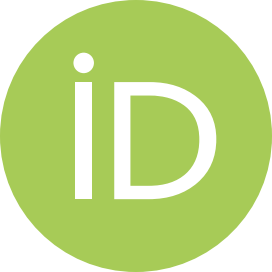

Supplement: s1 [file s1]

# Spontaneous Activity of Inhibitory Population in the Two-Cortical-Column Model

**A**

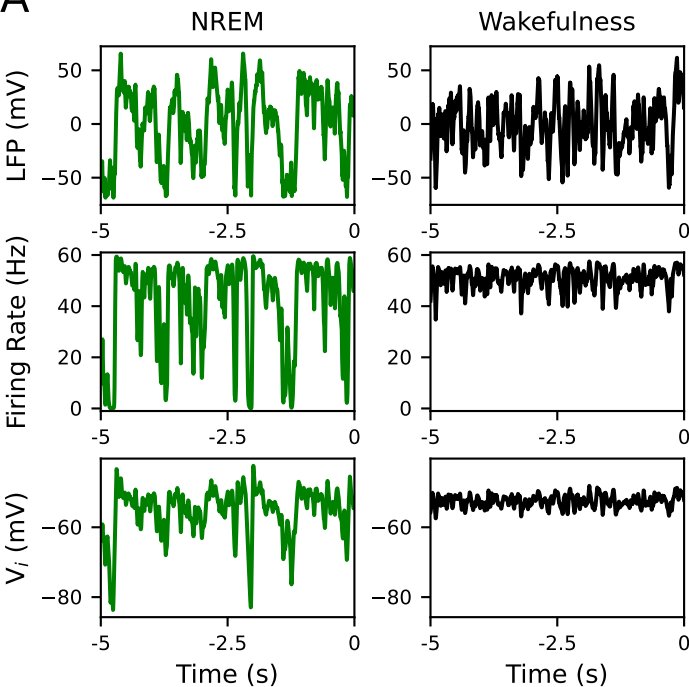

**B**

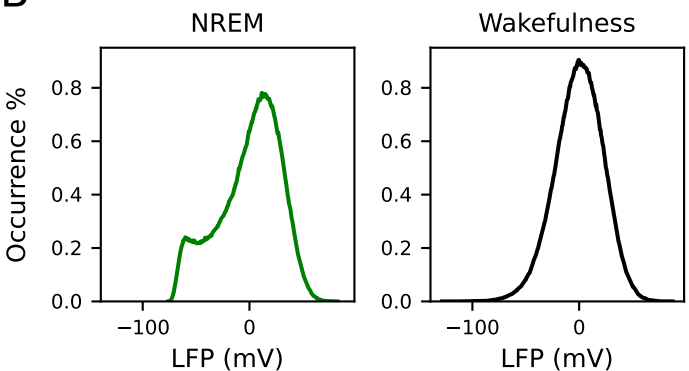

**C**

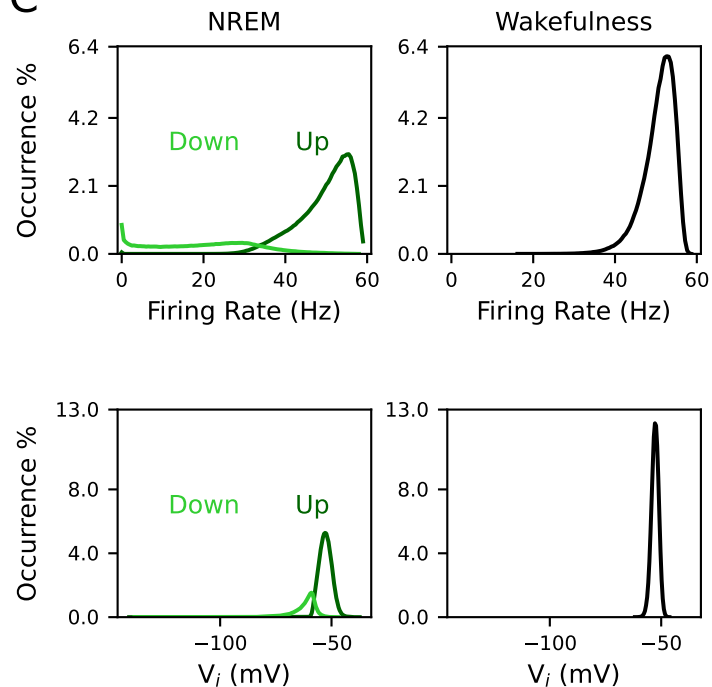

**D**

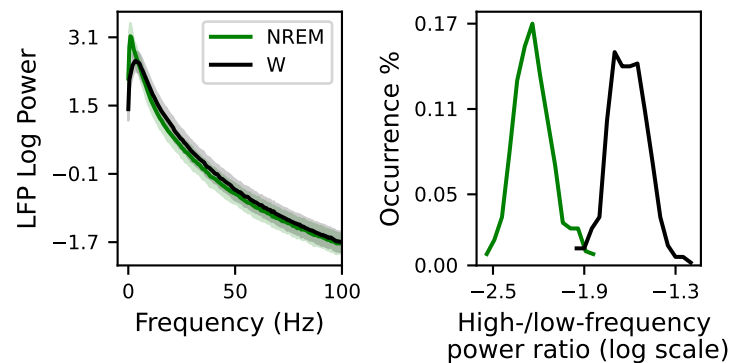

Supplement: s1 [file s1]

# Spontaneous Activity of Inhibitory Population in the Two-Cortical-Column Model

**A**

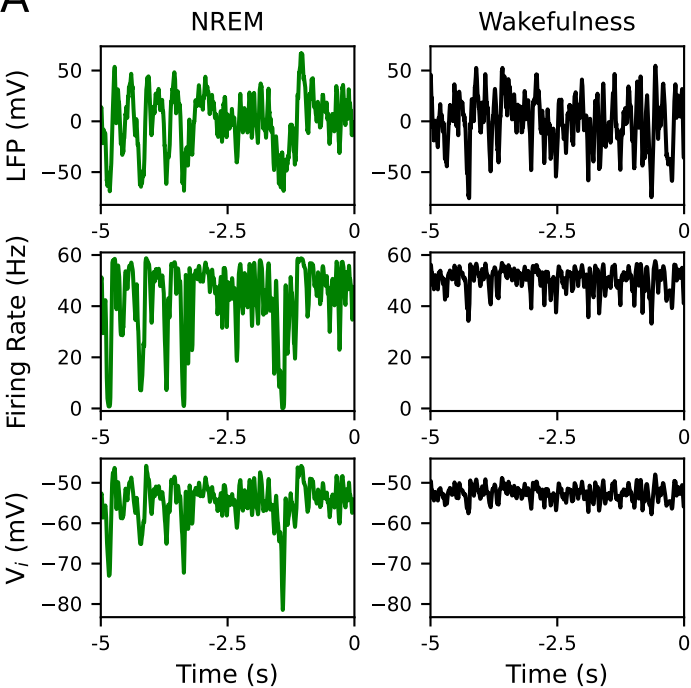

**B**

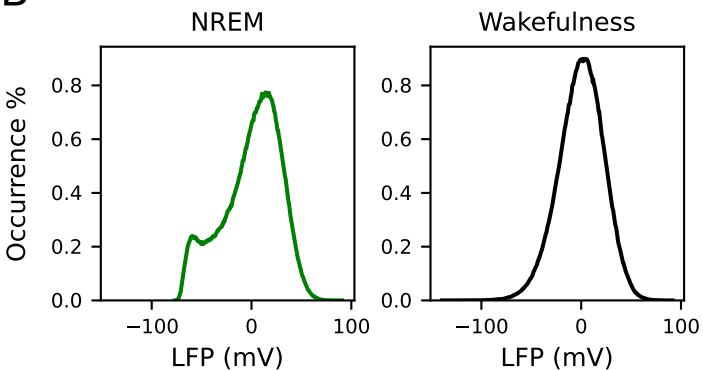

**C**

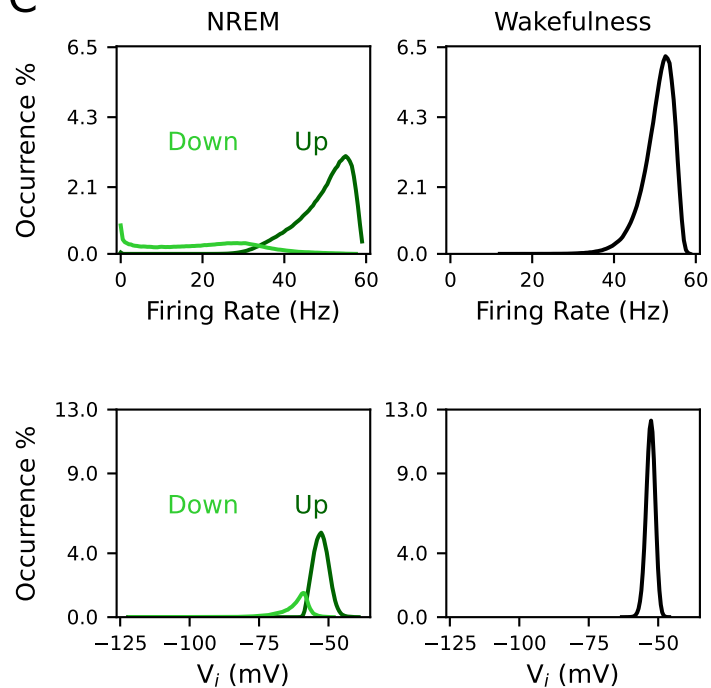

**D**

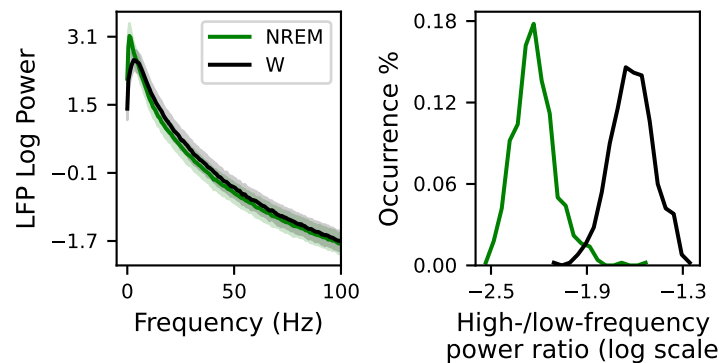

Supplement: s1 [file s1]

# Evoked Response of Inhibitory Population in the One-Cortical-Column Model

**A**

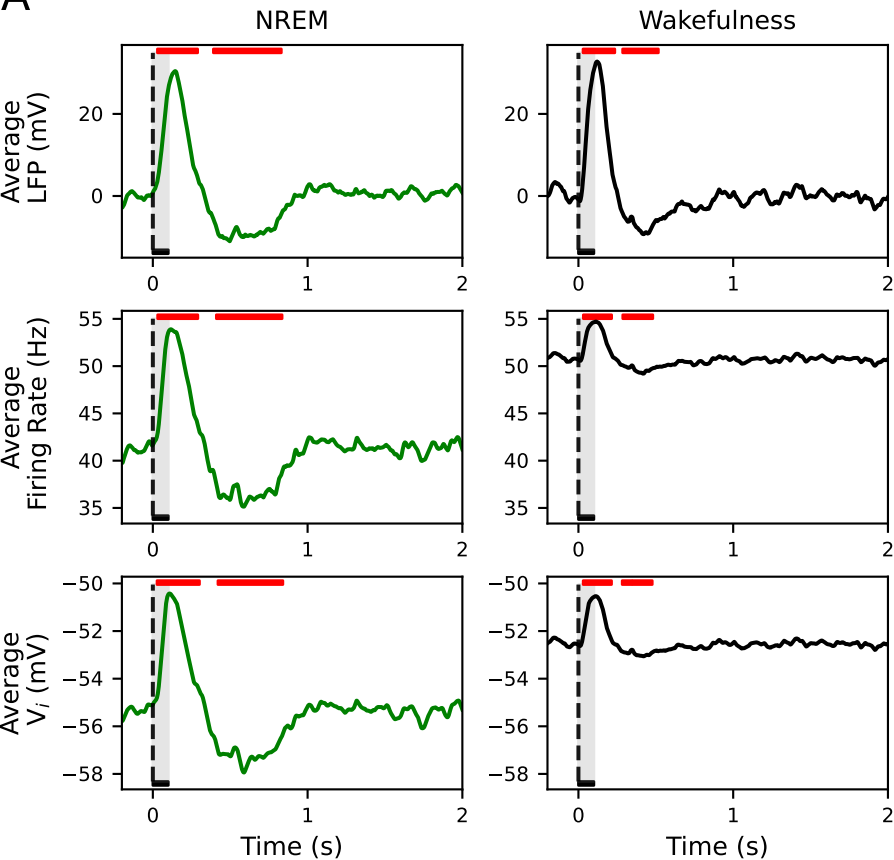

**B**

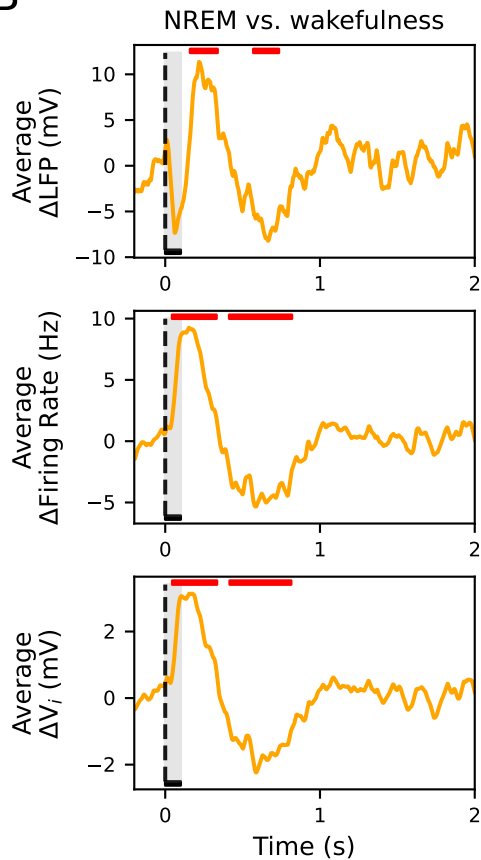

Supplement: s1 [file s1]

# Dynamical Analysis of the One-Cortical-Column Model

A

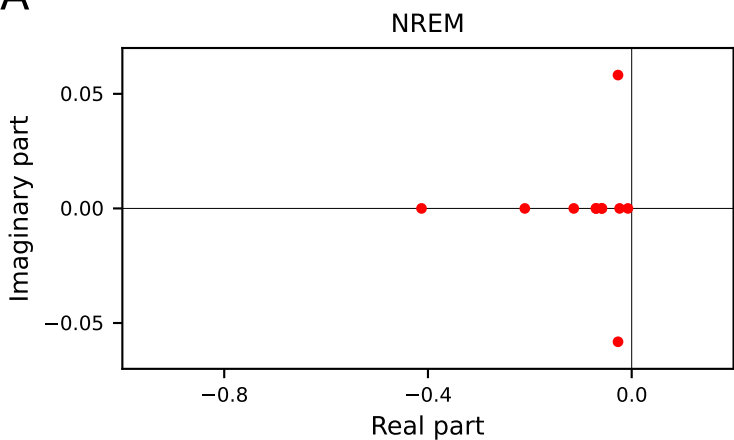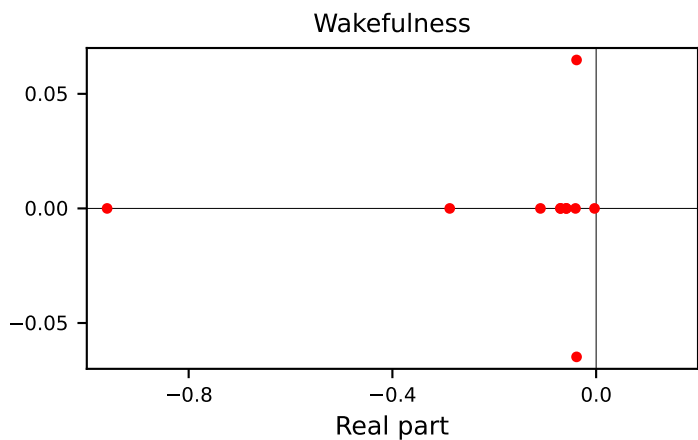

B

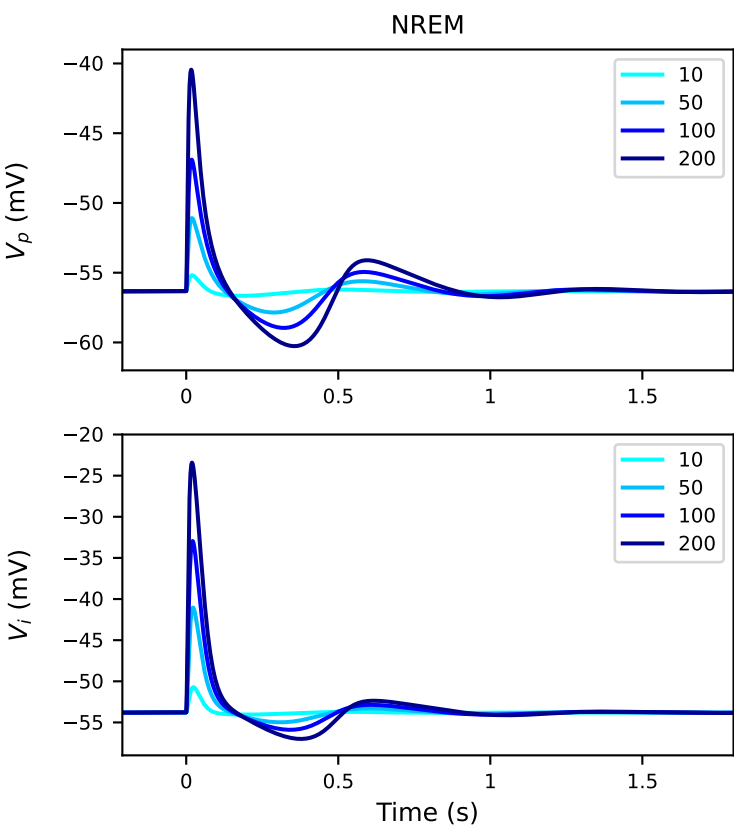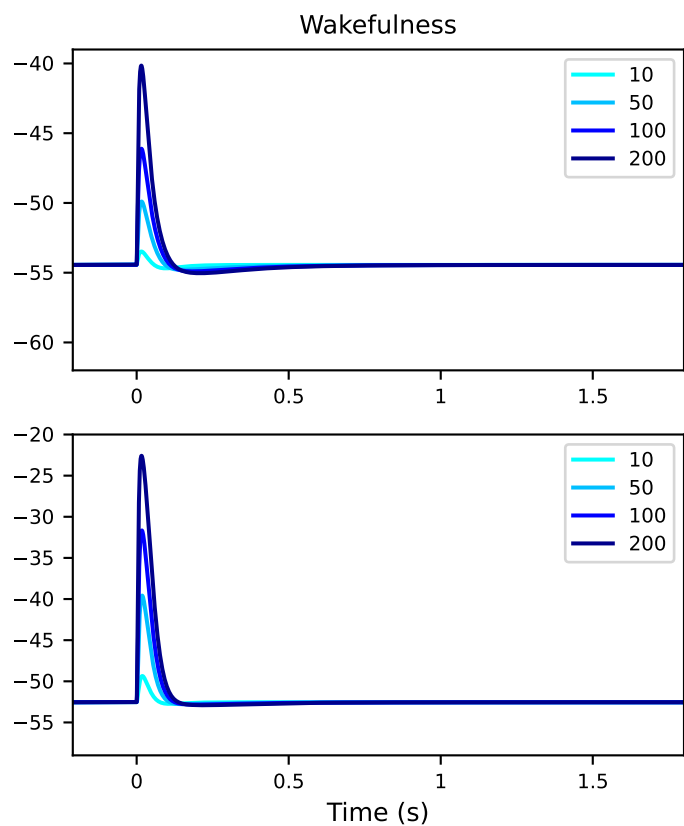

Supplement: s1 [file s1]

# Inhibitory Population of the Unperturbed Column

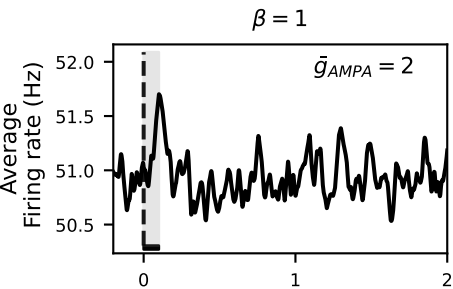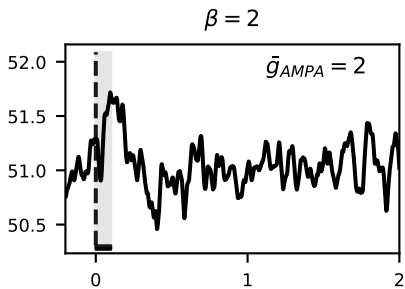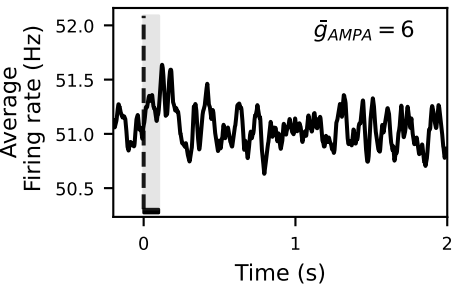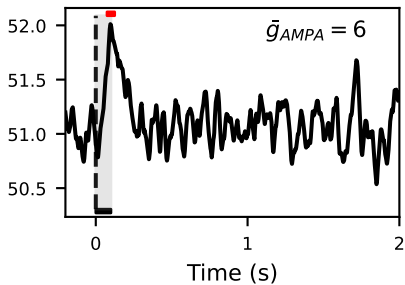

Supplement: s1 [file s1]

# Spontaneous Activity of Inhibitory Population in the One-Cortical-Column Model

**A**

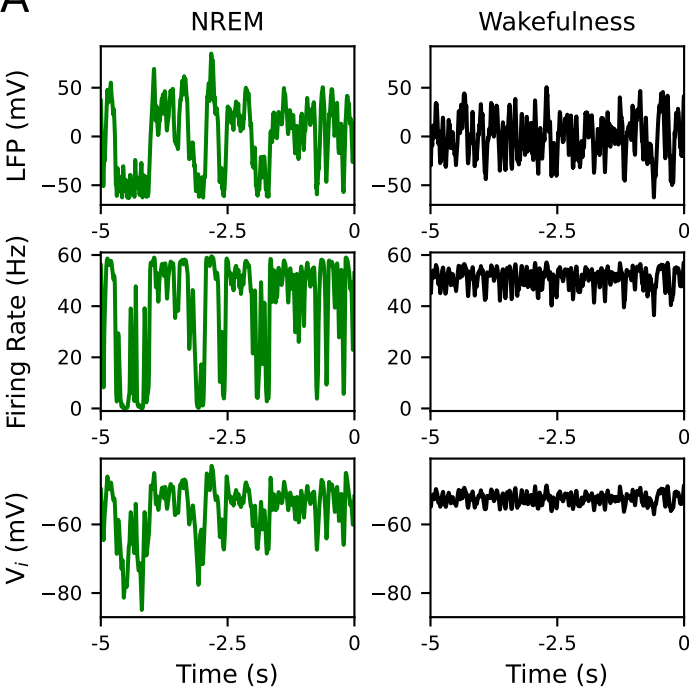

**B**

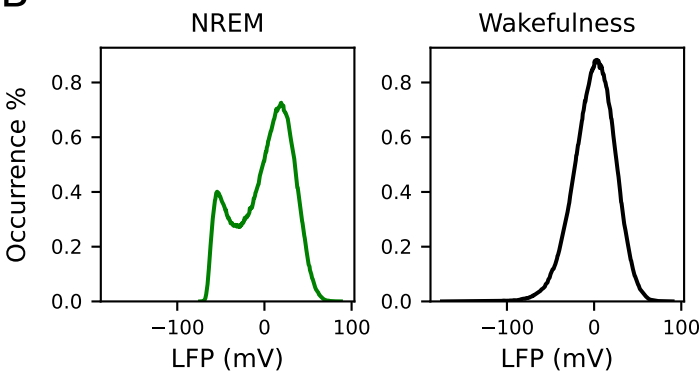

**C**

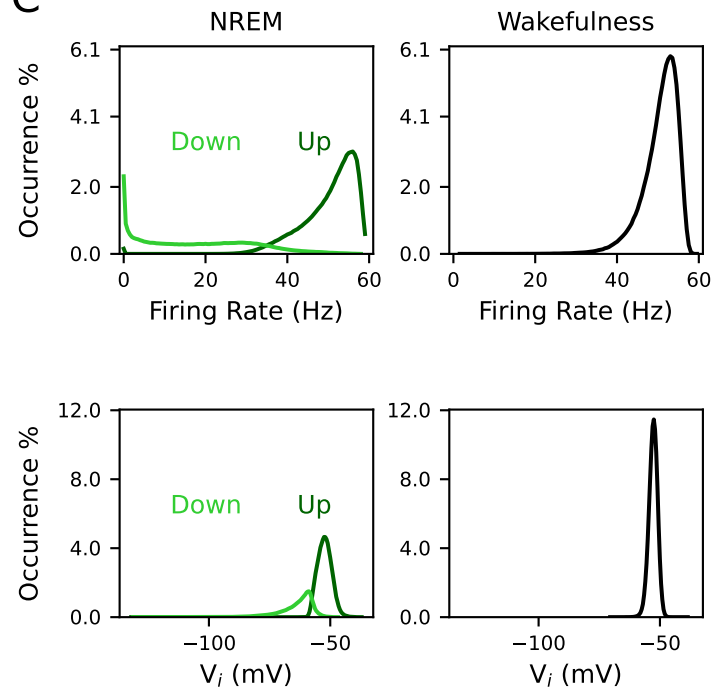

**D**

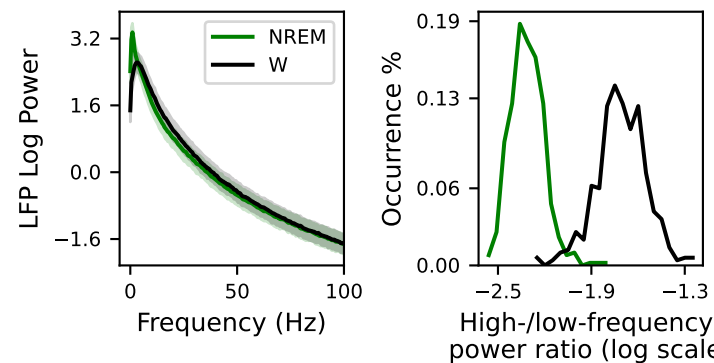

Supplement: s1 [file s1]

# Spontaneous Activity of Pyramidal Population in the Two-Cortical-Column Model

**A**

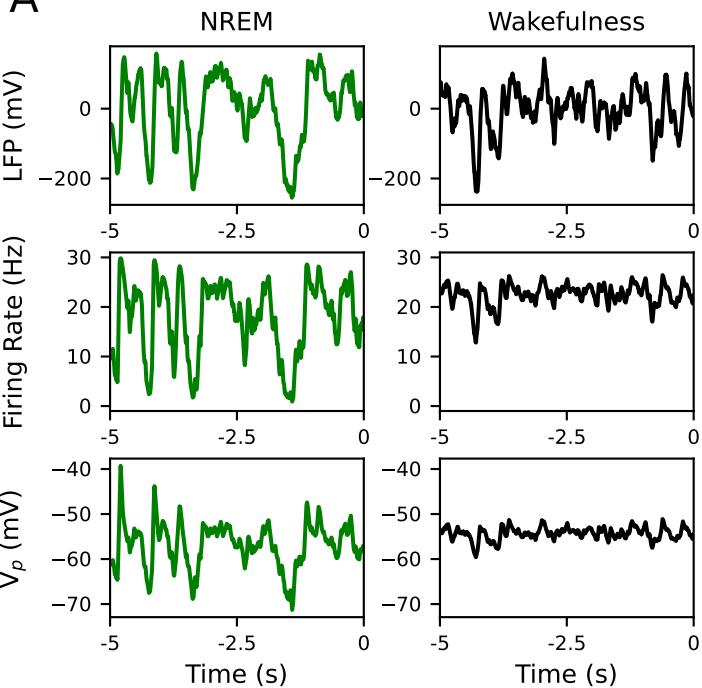

**B**

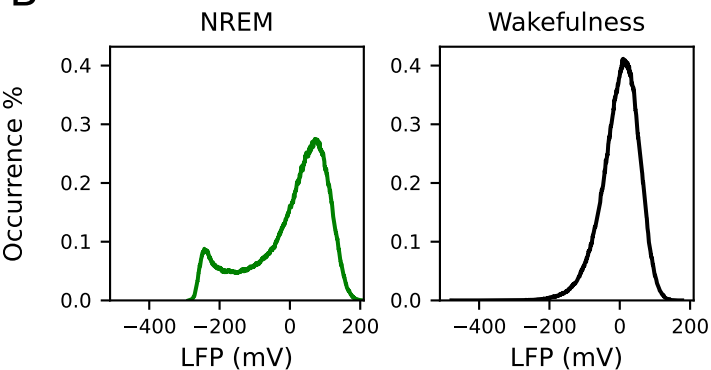

**C**

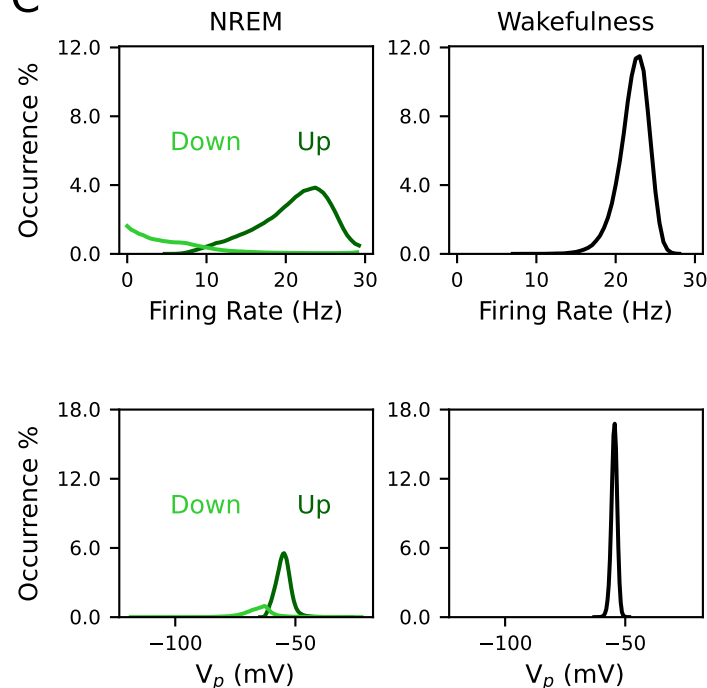

**D**

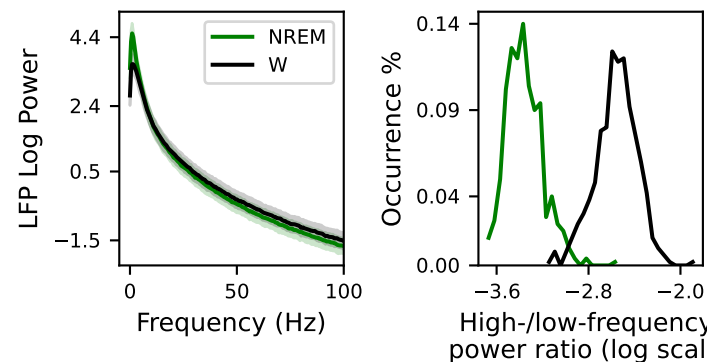

Supplement: s1 [file s1]

# Information Flow to the Inhibitory Population of the Unperturbed Column

A

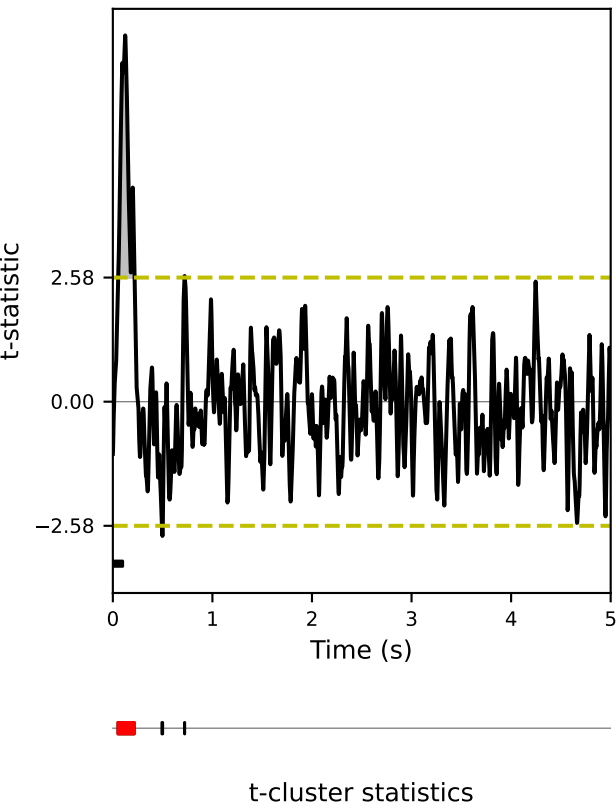

B

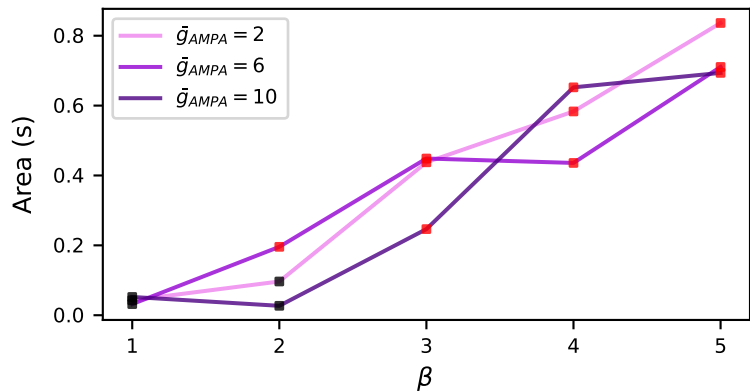

C

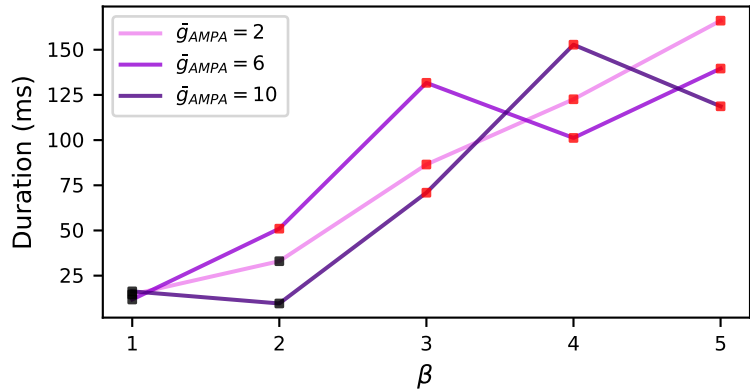

Supplement: s1 [file s1]
